# Supplementary material for: Tribochemistry and thermo-oxidative stability of halogen-free ionic liquids
Source: Royal Society of Chemistry journal article supplement (doi:10.1039/c7ra09163j), 2017-01-01
Supplement: c7ra09163j1.pdf [file c7ra09163j1.pdf]

## Tribochemistry and thermo-oxidative stability of halogen-free ionic liquids

Vladimir Totolin <sup>a,\*</sup>, Lucia Pisarova <sup>a</sup>, Nicole Dörr <sup>a</sup> and Ichiro Minami <sup>b</sup>

<sup>a</sup> AC2T research GmbH, Wiener Neustadt, Austria

<sup>b</sup> Division of Machine Elements, Luleå University of Technology, Luleå, Sweden

\* Corresponding author:

Vladimir Totolin

AC2T research GmbH

Viktor-Kaplan-Strasse 2/C

2700 Wiener Neustadt, Austria

Email: Vladimir.Totolin@ac2t.at

### Electronic supplementary information (ESI)

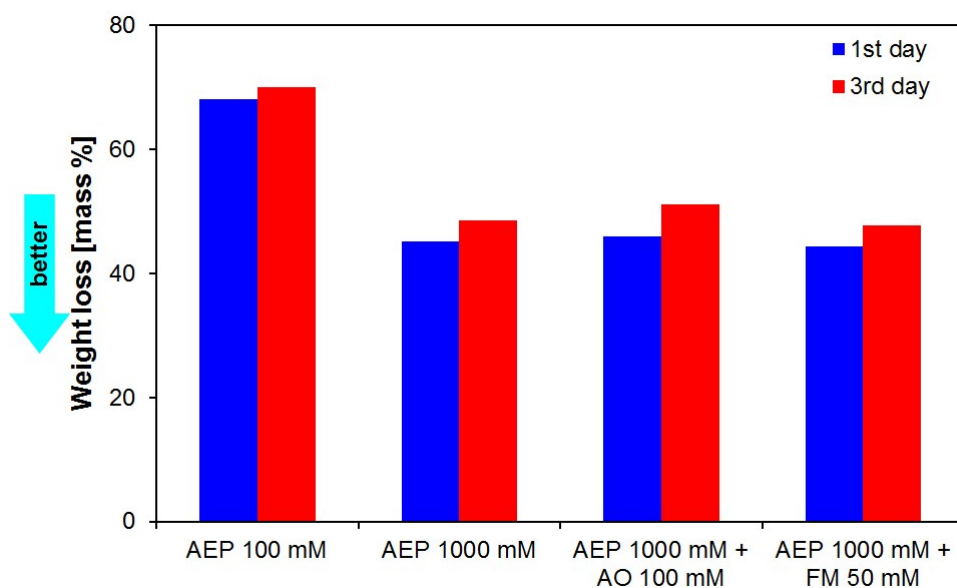

**Figure S1.** Weight loss at constant-temperature of 100 °C during the 1<sup>st</sup> and 3<sup>rd</sup> day. It shows that most of the weight loss occurred during the first 3 days.

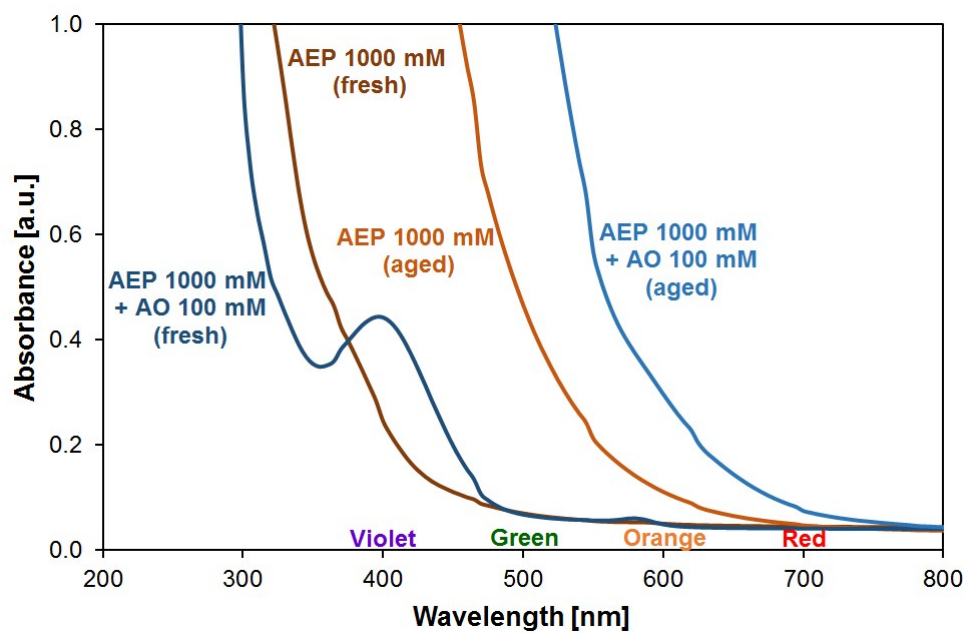

**Figure S2.** UV-VIS spectra for AEP 1000 mM + AO 100 mM compared to AEP 1000 mM in fresh and altered conditions (for 7 days). It shows the differences in the colors for the two mixtures. The colors at their characteristic wavelengths are indicated.

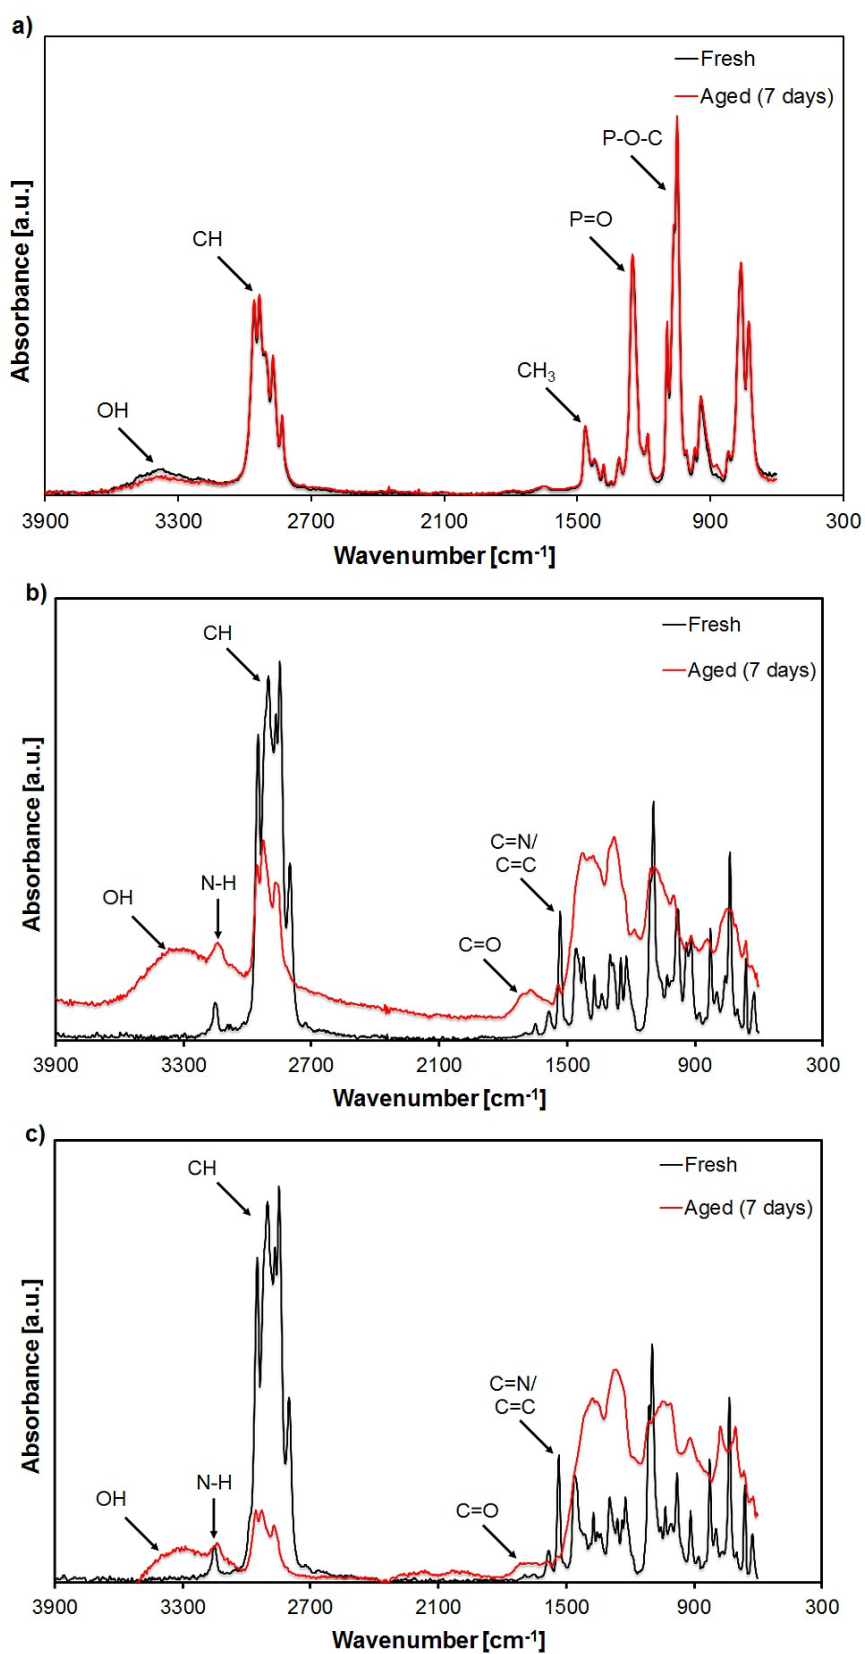

**Figure S3.** FTIR spectra of neat fluids in fresh and altered condition: tributylmethylphosphonium dimethylphosphate (a); N-allylimidazole trybutylborane (b) and N-ethylimidazole trybutylborane (c)

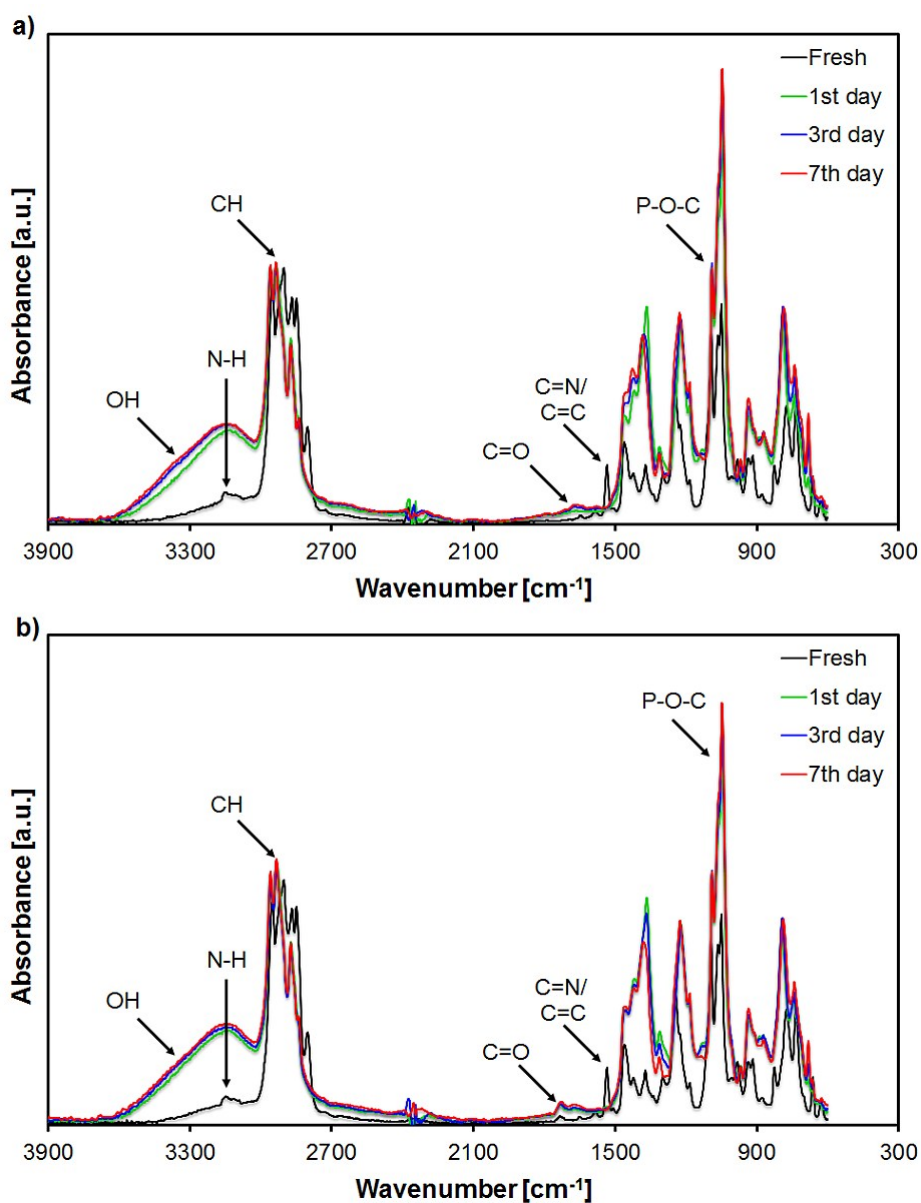

**Figure S4.** FTIR spectra of AEP 1000 mM + AO 100 mM (a) and AEP 1000 mM + 50 FM (b) showing no significant changes between the two artificially altered samples as displayed in the mass loss results from Figs. 3 and S1.

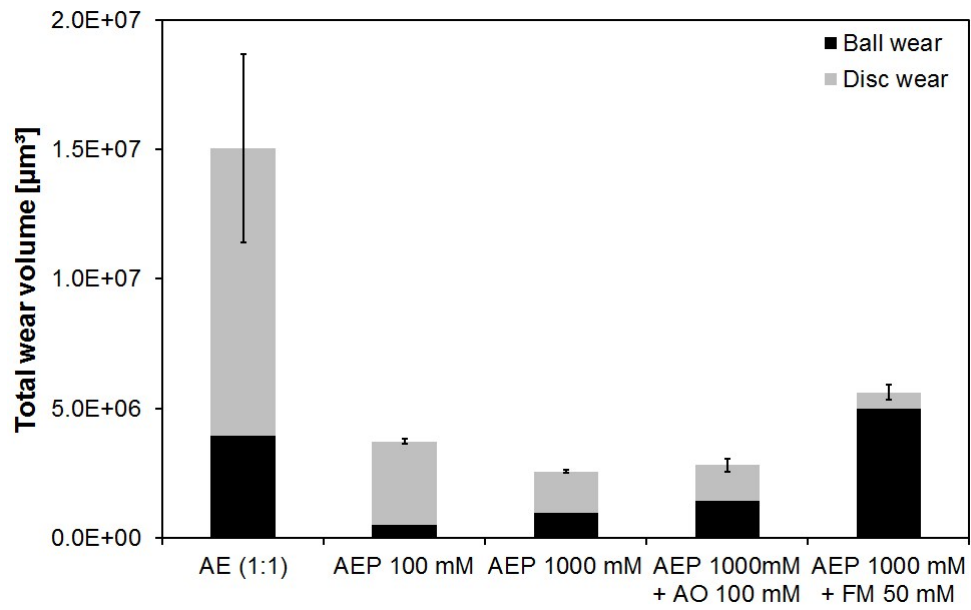

**Figure S5.** Total wear volume of both counterparts: balls and discs

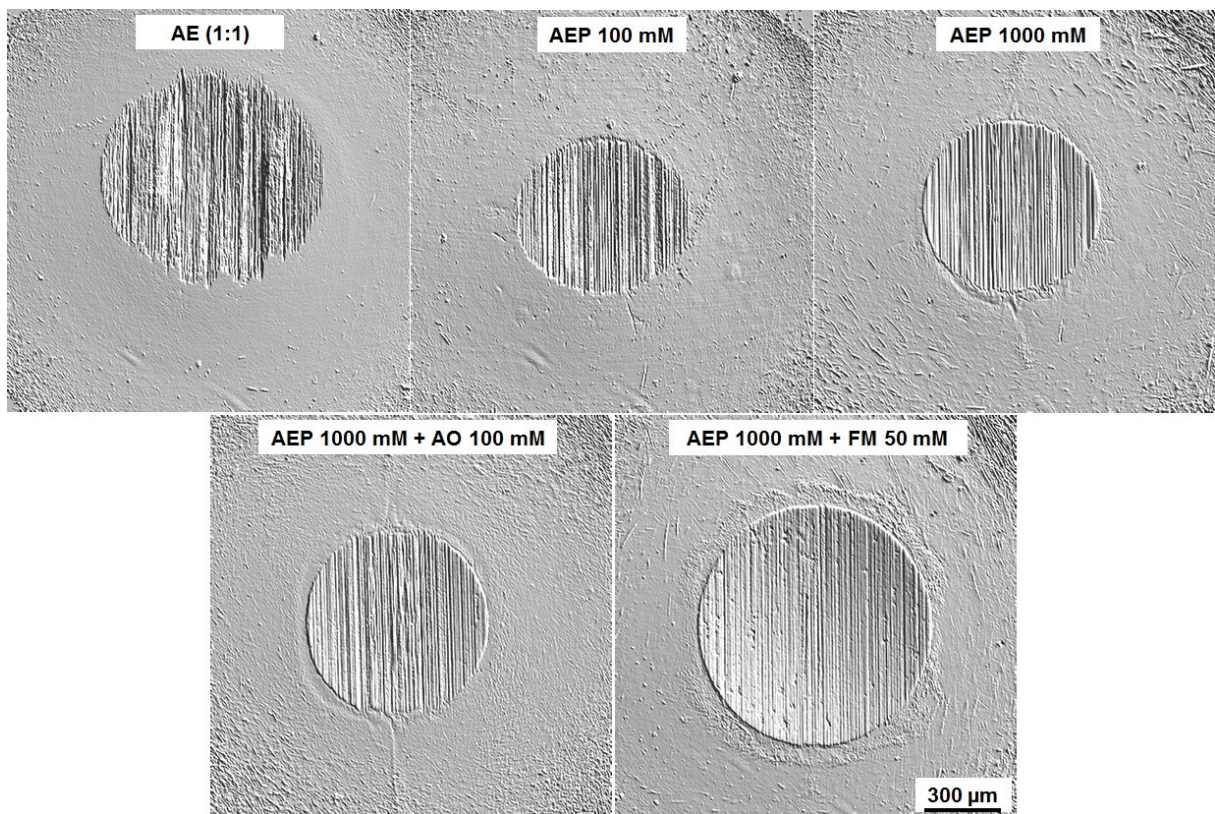

**Figure S6.** Surface topography showing the wear scars on the balls (the same scale is valid for all the micrographs)

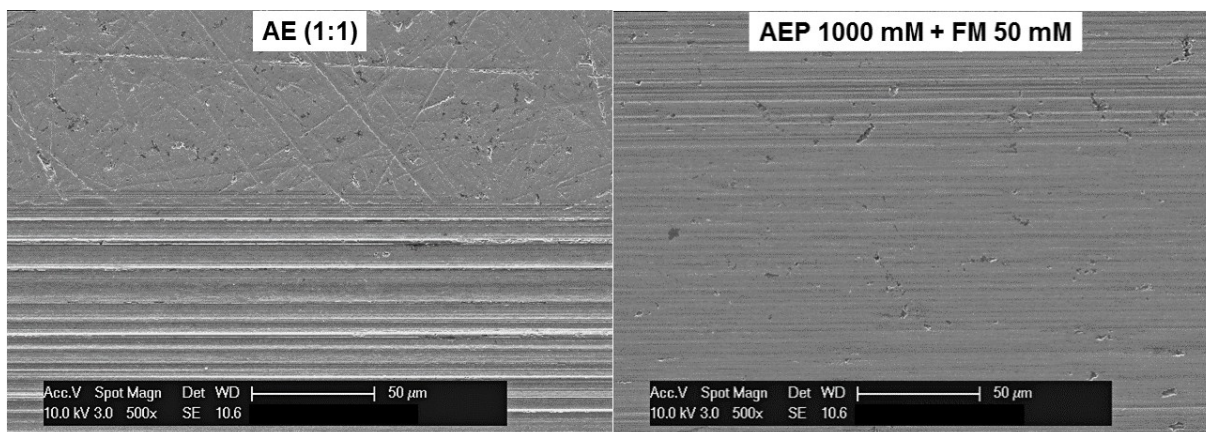

**Figure S7.** SEM micrographs of the discs lubricated with AE (1:1) and AEP 1000 mM + FM 50 mM

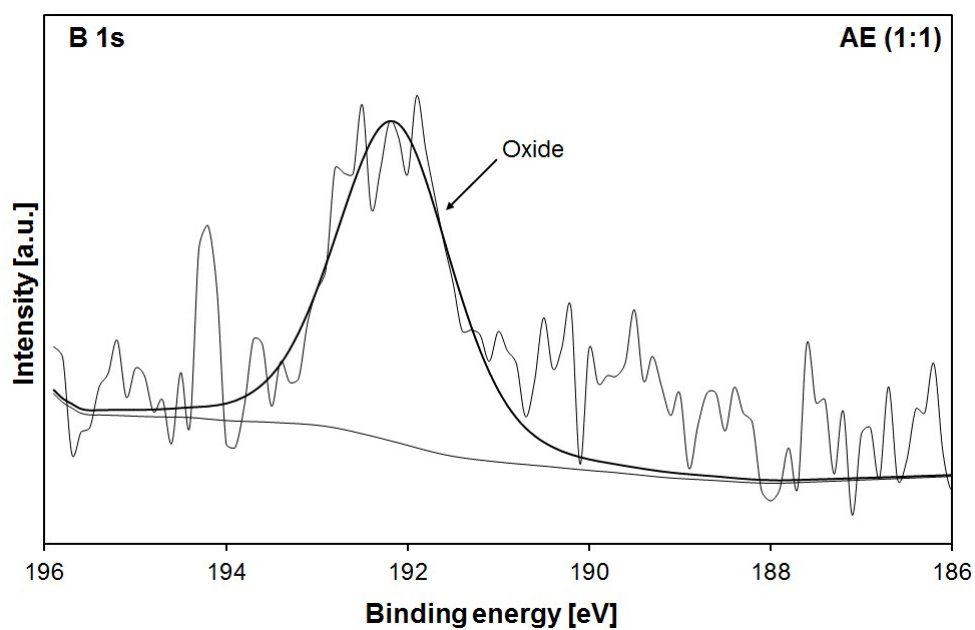

**Figure S8.** High resolution XPS spectrum of B 1s from the AE (1:1) mixture showing the appearance of boron oxide inside the wear scar generated on the steel disc
